# Supplementary material for: Prednisolone Nanoprecipitation with Dean Instability Microfluidics Mixer
Source: MDPI journal article supplement (doi:10.3390/nano14080652), 2024-04-09
Supplement: s1 [file s1]

Supplementary Materials

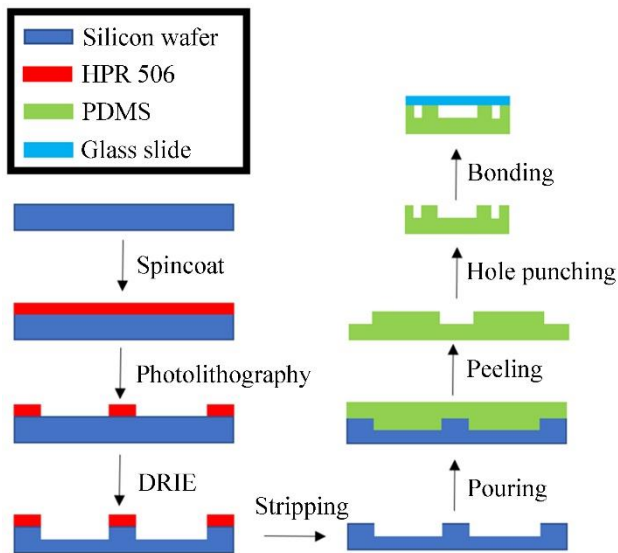

Supp. Figure S1 work flow of the fabrication

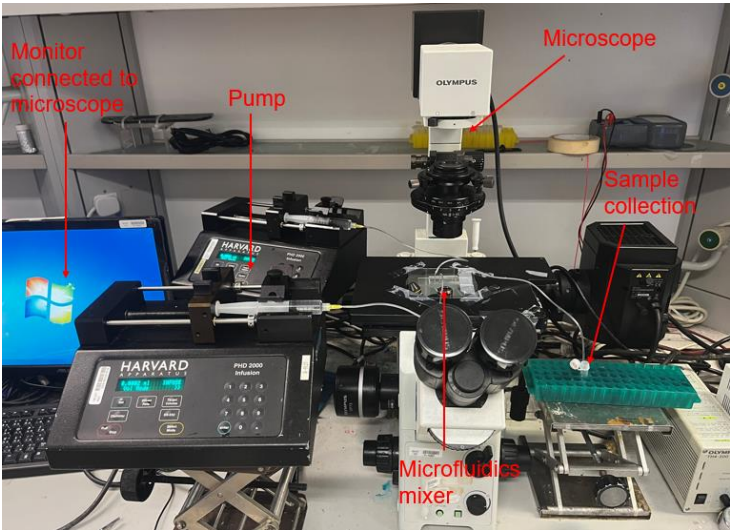

Supp. Figure S2 Experimental setup

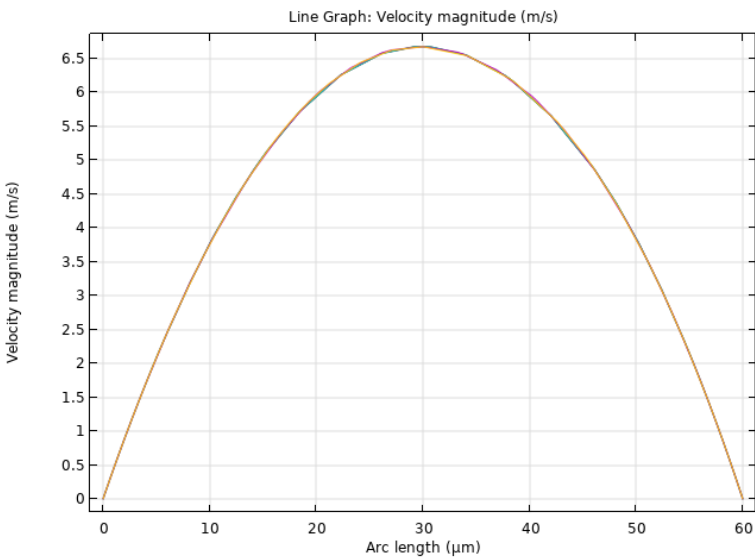

Supp. Figure S3 Convergence of velocity

The velocity profile along the horizontal midline near the inlet is investigated. The velocity profile converges to a parabolic shape as the meshing changes from 1 to 6.

Supp. Table S1 Meshing tested for the convergence test

|                                        | Meshing1 | Meshing2 | Meshing3 | Meshing4 | Meshing5 | Meshing6 |
|----------------------------------------|----------|----------|----------|----------|----------|----------|
| Maximum element size[ $\mu\text{m}$ ]  | 54.2     | 32.9     | 21.4     | 16.4     | 11       | 8.71     |
| Minimum element size [ $\mu\text{m}$ ] | 11.5     | 8.22     | 6.57     | 4.93     | 3.29     | 1.64     |
| Maximum element growth rate            | 1.4      | 1.3      | 1.25     | 1.2      | 1.15     | 1.13     |
| Curvature factor                       | 1        | 0.9      | 0.8      | 0.7      | 0.6      | 0.5      |
| Resolution of narrow regions           | 0.3      | 0.4      | 0.5      | 0.6      | 0.7      | 0.8      |

Supp. Table S2 Top 10 best performed mixing patterns (two repeating units) at Dean instability

| 2nd radius of curvature[ $\mu\text{m}$ ] | 3rd radius of curvature[ $\mu\text{m}$ ] | Mixing length | Mixing Index (cor. to 3 sig. fig) |
|------------------------------------------|------------------------------------------|---------------|-----------------------------------|
| 50                                       | 200                                      | 403           | 0.988                             |
| 60                                       | 260                                      | 362           | 0.987                             |
| 60                                       | 210                                      | 384           | 0.986                             |
| 50                                       | 190                                      | 409           | 0.986                             |
| 60                                       | 190                                      | 395           | 0.985                             |
| 40                                       | 160                                      | 451           | 0.985                             |
| 70                                       | 200                                      | 373           | 0.981                             |
| 70                                       | 220                                      | 366           | 0.981                             |
| 60                                       | 170                                      | 408           | 0.980                             |
| 70                                       | 230                                      | 360           | 0.979                             |

As shown in the Supp. Table S2, the mixing length varies in the top 10 of channel geometries at Dean instability. The trend does not follow the longer mixing length better mixing efficiency principle which is usually applicable in the traditional microfluidics mixing. An additional possible reason here may be the difference in the mixing length is too subtle to notice the result. From the experimental result in the main text, it is observed that the mixing length does matter as in the lowest flow rate we tested. This proves the insufficient difference in mixing length for the optimization simulation.
